# Supplementary material
Source: publisher site journal article supplement (https://www.spandidos-publications.com/3716/downloadSupplementary)
Supplement: Supplementary file 1 [file downloadSupplementary]

## Sheet: Table SⅤ
Table SV. All differentially expressed geness of GSE57691.
Symbol	log2FC	P-value	Group
LOC642113	4.13538	4.45X10-7	UP
IL6	3.64026	2.45X10-8	UP
FOSB	3.52265	5.16X10-10	UP
HBA2	3.43648	1.17X10-11	UP
LOC649923	3.39723	1.37X10-5	UP
SFRP4	3.30709	1.43X10-12	UP
HBB	3.29945	2.09X10-10	UP
IL1B	3.28047	5.12X10-10	UP
LOC652493	3.17599	5.11X10-5	UP
LOC647450	3.14552	6.59X10-5	UP
LOC651751	3.14544	3.34X10-5	UP
SIK1	3.06372	2.08X10-6	UP
CD79A	3.05472	1.39X10-6	UP
LOC652694	3.03793	7.05X10-5	UP
SELL	3.00708	3.94X10-9	UP
HBG2	2.9838	2.40X10-5	UP
CD19	2.97072	4.02X10-5	UP
LTB	2.87869	3.31X10-9	UP
CCR7	2.87069	3.84X10-7	UP
HBG1	2.85256	7.42X10-5	UP
CR2	2.81515	2.31X10-4	UP
NR4A2	2.78513	1.07X10-6	UP
BCL11A	2.73547	4.65X10-8	UP
IL8	2.72407	9.49X10-7	UP
RGS16	2.71287	5.68X10-11	UP
CAMK1G	2.65155	2.64X10-5	UP
SELE	2.61749	1.45X10-6	UP
HNRPH1	2.53354	3.22X10-10	UP
MZB1	2.53272	8.91X10-5	UP
ZC3H12A	2.53215	4.49X10-9	UP
FCN1	2.51958	1.59X10-11	UP
FAIM3	2.5146	1.37X10-6	UP
SOCS3	2.49004	4.22X10-5	UP
CXCR5	2.47876	1.97X10-5	UP
UCP2	2.45616	2.60X10-8	UP
TNFAIP3	2.44773	5.50X10-10	UP
CRKRS	2.4443	3.32X10-5	UP
PIM2	2.44101	1.74X10-6	UP
TMEM119	2.42604	2.05X10-10	UP
MOXD1	2.42296	8.03X10-7	UP
VPREB3	2.40835	6.82X10-4	UP
SEMA4A	2.40094	8.88X10-10	UP
SPOCK2	2.39793	3.38X10-10	UP
BTG2	2.37628	5.81X10-11	UP
THBS4	2.37596	5.75X10-5	UP
MIAT	2.36015	1.85X10-8	UP
EGR2	2.35495	2.12X10-8	UP
FAM46C	2.31154	1.14X10-7	UP
P2RY8	2.30026	4.57X10-9	UP
HLA-DOB	2.29572	6.38X10-5	UP
CXCL13	2.27957	8.91X10-4	UP
C4orf7	2.27707	3.66X10-3	UP
PADI4	2.26796	5.29X10-6	UP
ITK	2.24353	2.30X10-7	UP
CXCL2	2.23456	3.86X10-5	UP
CD69	2.2332	8.22X10-6	UP
NLF2	2.22187	9.42X10-5	UP
JUNB	2.20935	2.90X10-9	UP
FER1L4	2.19571	1.36X10-5	UP
NR4A3	2.19248	8.32X10-6	UP
GFPT2	2.17714	6.27X10-6	UP
ICOS	2.17525	1.69X10-6	UP
HBEGF	2.17358	6.21X10-6	UP
FOS	2.17357	1.72X10-6	UP
IL2RB	2.17035	2.26X10-9	UP
GPR68	2.15214	1.34X10-7	UP
CD83	2.14636	5.48X10-7	UP
CCL3L3	2.14129	1.19X10-6	UP
CD37	2.12939	4.00X10-6	UP
C3	2.1122	1.92X10-5	UP
CXCR4	2.10939	6.34X10-6	UP
TBC1D10C	2.10519	3.85X10-7	UP
FCRLA	2.10119	2.84X10-3	UP
CD7	2.10099	3.92X10-7	UP
CEMIP	2.09518	9.34X10-4	UP
LOC729021	2.09332	1.86X10-5	UP
FAM65B	2.07797	2.65X10-7	UP
PTPRCAP	2.07104	5.47X10-5	UP
POU2AF1	2.07052	1.17X10-3	UP
RNF126P1	2.06988	6.57X10-3	UP
LOC652775	2.06467	8.54X10-3	UP
IGLL3	2.06005	5.66X10-3	UP
BANK1	2.05709	1.36X10-3	UP
SFRP2	2.05255	1.58X10-5	UP
GZMB	2.0511	2.95X10-5	UP
MMP9	2.04873	3.92X10-4	UP
CD79B	2.04491	2.44X10-5	UP
JARID1D	2.04083	2.17X10-5	UP
LOC653879	2.03153	1.05X10-4	UP
PDE4B	2.00111	7.34X10-9	UP
CCL4L1	1.99498	1.23X10-5	UP
G0S2	1.98612	2.33X10-4	UP
PRKCQ	1.98456	7.53X10-7	UP
LOC653158	1.97757	3.32X10-8	UP
LEF1	1.97377	5.92X10-7	UP
CD247	1.96537	2.61X10-7	UP
KIAA0125	1.95994	5.96X10-5	UP
PIM1	1.9582	2.95X10-8	UP
IGJ	1.95767	5.83X10-3	UP
ITGAL	1.95591	1.72X10-7	UP
EGR3	1.95262	2.10X10-4	UP
MXRA5	1.94645	6.02X10-8	UP
IL7R	1.94457	1.68X10-6	UP
GREM1	1.94149	8.78X10-5	UP
PSORS1C1	1.94114	9.12X10-4	UP
UBD	1.93689	1.18X10-4	UP
CRIPAK	1.93382	9.86X10-7	UP
SFRP1	1.93271	4.03X10-5	UP
LRMP	1.93038	2.48X10-7	UP
ALPK2	1.9299	7.99X10-5	UP
COL11A1	1.92193	4.91X10-3	UP
ATF3	1.92003	7.57X10-4	UP
CD24	1.91925	9.11X10-4	UP
LOC652102	1.91649	3.18X10-2	UP
MAP4K1	1.9147	2.44X10-7	UP
CD3D	1.91258	8.02X10-5	UP
PASK	1.90356	9.12X10-9	UP
TIMD4	1.90198	4.24X10-3	UP
ALAS2	1.90142	5.67X10-4	UP
CX3CR1	1.89344	7.00X10-5	UP
FCRL2	1.87347	4.98X10-4	UP
COL1A1	1.86794	3.78X10-6	UP
PLAC8	1.86766	1.01X10-4	UP
ADAM19	1.86594	3.29X10-9	UP
LOC401357	1.85703	3.43X10-6	UP
CD2	1.85044	5.32X10-7	UP
OSM	1.84466	5.74X10-5	UP
CCL4L2	1.83576	3.36X10-6	UP
LOC645436	1.8352	1.64X10-8	UP
JAK1	1.83063	8.04X10-5	UP
CD6	1.82125	1.30X10-5	UP
FCRL3	1.81838	2.70X10-4	UP
ACAP1	1.81822	2.84X10-6	UP
LOC401845	1.81719	1.63X10-2	UP
GSDMB	1.81634	7.22X10-11	UP
SP140	1.81518	1.24X10-5	UP
CTLA4	1.80881	8.54X10-4	UP
WAS	1.805	5.24X10-11	UP
MMP12	1.80387	2.23X10-2	UP
FAM129C	1.80346	5.32X10-5	UP
ITPR3	1.79738	2.27X10-10	UP
TSPAN32	1.79245	1.91X10-6	UP
TAGAP	1.79095	7.32X10-6	UP
CXorf45	1.78409	7.91X10-11	UP
LOC651898	1.77394	1.42X10-3	UP
PLCH2	1.7664	1.94X10-8	UP
PRDM1	1.7548	1.09X10-6	UP
DUSP5	1.74563	3.37X10-5	UP
RPS4Y1	1.74297	1.29X10-2	UP
TDO2	1.74026	1.64X10-5	UP
RUNX3	1.73643	1.31X10-7	UP
TNFRSF13B	1.73519	1.10X10-3	UP
LRRN2	1.73079	7.05X10-6	UP
HLA-DQA1	1.72834	4.21X10-5	UP
RASAL3	1.72785	8.48X10-8	UP
JSRP1	1.72446	7.75X10-3	UP
SAMSN1	1.72127	3.82X10-7	UP
MEG3	1.72061	6.15X10-7	UP
CST7	1.71614	1.83X10-6	UP
LBA1	1.71205	2.41X10-14	UP
ZBP1	1.71045	1.53X10-5	UP
ARHGAP30	1.70447	9.49X10-8	UP
THY1	1.70357	8.10X10-9	UP
DGKA	1.69541	1.26X10-6	UP
GBP5	1.68618	9.94X10-7	UP
GNG2	1.68483	2.90X10-6	UP
C13orf18	1.68285	1.96X10-7	UP
DVL3	1.68173	1.45X10-10	UP
SLC2A3	1.68113	1.81X10-6	UP
KIAA1641	1.67537	1.09X10-12	UP
TP53INP1	1.66682	3.46X10-6	UP
CD8A	1.66224	1.09X10-4	UP
IL10RA	1.66146	1.89X10-6	UP
USP36	1.65664	5.05X10-6	UP
BTN3A2	1.65645	7.78X10-7	UP
LOC648210	1.65127	7.17X10-6	UP
TNFRSF4	1.64851	2.00X10-5	UP
LOC728715	1.64712	3.85X10-5	UP
BCL11B	1.64629	5.69X10-4	UP
LOC641825	1.64327	6.94X10-6	UP
ISG20	1.64273	8.60X10-7	UP
NFKBIZ	1.63949	5.44X10-9	UP
EIF1AY	1.63806	3.32X10-3	UP
CCL21	1.63361	2.28X10-3	UP
KIAA1881	1.62909	2.12X10-2	UP
OSBPL3	1.62783	3.11X10-9	UP
SIRPG	1.62697	9.89X10-4	UP
FCER1A	1.62688	2.17X10-4	UP
CCNL1	1.62502	4.25X10-10	UP
CORO1A	1.62398	3.75X10-6	UP
MMP11	1.61218	1.32X10-3	UP
IER3	1.60751	1.07X10-4	UP
GNLY	1.60713	2.24X10-4	UP
RAB3IP	1.60602	5.80X10-10	UP
CEP110	1.60261	2.18X10-10	UP
CCL3	1.60257	4.95X10-4	UP
EBI2	1.60069	4.20X10-6	UP
NKG7	1.5991	6.27X10-6	UP
BLK	1.59355	4.38X10-3	UP
LOC649210	1.59317	9.59X10-3	UP
CCL3L1	1.58729	9.02X10-4	UP
SNORA70	1.58615	7.31X10-14	UP
C21orf81	1.58248	2.73X10-5	UP
COL1A2	1.58028	9.14X10-9	UP
SLC2A14	1.57995	2.98X10-4	UP
PTGS2	1.57933	1.79X10-4	UP
TNFAIP2	1.57567	3.90X10-6	UP
PLCB2	1.57464	5.55X10-6	UP
STK17B	1.56944	9.91X10-6	UP
GZMK	1.56655	2.20X10-4	UP
SPIB	1.56522	2.31X10-4	UP
THBS1	1.56315	1.66X10-5	UP
NUAK2	1.5613	6.43X10-9	UP
TPSAB1	1.56026	8.68X10-4	UP
APLNR	1.55942	1.25X10-6	UP
EVI2B	1.55468	4.19X10-4	UP
OTUD4	1.54945	1.25X10-6	UP
CH25H	1.54792	2.61X10-5	UP
HLA-DQB1	1.54733	2.10X10-2	UP
NFATC1	1.54311	2.24X10-4	UP
RAB37	1.5407	2.34X10-6	UP
BHLHB2	1.54046	3.78X10-8	UP
FCRL5	1.53889	3.54X10-4	UP
SPON1	1.53453	5.41X10-3	UP
SEMA4D	1.53366	8.31X10-7	UP
TIMP3	1.53273	6.21X10-6	UP
CRISPLD2	1.53251	3.20X10-4	UP
ICAM3	1.52536	1.05X10-6	UP
LOC645385	1.52306	4.67X10-6	UP
STMN2	1.52075	2.50X10-3	UP
LUM	1.52038	7.16X10-7	UP
SEPP1	1.51294	1.35X10-5	UP
F13A1	1.50795	4.74X10-5	UP
LIME1	1.50786	6.00X10-6	UP
RGS2	1.50774	2.71X10-6	UP
SCG2	1.50729	6.00X10-5	UP
C9orf45	1.50722	7.90X10-4	UP
MMP25	1.50293	4.18X10-5	UP
ZBTB8A	-1.50331	3.02X10-5	DOWN
FOXD2	-1.50352	4.88X10-7	DOWN
C5orf46	-1.50471	2.35X10-3	DOWN
BVES	-1.50523	1.03X10-7	DOWN
RAB5C	-1.50526	3.29X10-8	DOWN
ALCAM	-1.50888	1.29X10-7	DOWN
LMO3	-1.5089	2.59X10-3	DOWN
KCNK3	-1.5118	9.82X10-8	DOWN
RASL11A	-1.51264	1.39X10-5	DOWN
GCAT	-1.51323	1.66X10-10	DOWN
CHSY3	-1.51744	4.88X10-5	DOWN
ADCK4	-1.5192	1.31X10-8	DOWN
C2orf49	-1.52101	3.08X10-9	DOWN
ADI1	-1.52153	2.96X10-7	DOWN
FAM50B	-1.52203	4.97X10-6	DOWN
SHC4	-1.53897	8.27X10-5	DOWN
LOC649366	-1.53953	6.38X10-3	DOWN
CTPS	-1.54072	2.06X10-8	DOWN
GNB5	-1.54655	8.25X10-6	DOWN
FXYD1	-1.54815	1.18X10-4	DOWN
TPRKB	-1.55001	2.40X10-4	DOWN
ADORA3	-1.55007	1.63X10-3	DOWN
HSPB8	-1.55271	3.01X10-4	DOWN
FLJ10781	-1.55538	9.12X10-6	DOWN
ZCCHC6	-1.56275	6.13X10-5	DOWN
MT1E	-1.56372	4.54X10-10	DOWN
ZNF271	-1.56416	1.06X10-6	DOWN
PVRL3	-1.56454	1.83X10-6	DOWN
NFIA	-1.56567	4.38X10-4	DOWN
GNA11	-1.56595	2.07X10-5	DOWN
TC2N	-1.56597	5.90X10-5	DOWN
RPL35A	-1.5676	1.53X10-3	DOWN
MYL9	-1.56836	5.18X10-5	DOWN
C20orf127	-1.5685	6.90X10-8	DOWN
SNAPIN	-1.56979	6.04X10-8	DOWN
HOXA9	-1.57078	1.16X10-4	DOWN
MYOM1	-1.57274	3.07X10-4	DOWN
SORBS1	-1.57959	9.31X10-4	DOWN
CDKN2C	-1.58883	2.38X10-3	DOWN
RAB27A	-1.59063	1.15X10-7	DOWN
CRYAB	-1.59223	4.81X10-5	DOWN
TNFAIP8L3	-1.59587	2.61X10-7	DOWN
TTLL7	-1.60098	7.59X10-9	DOWN
EXOSC4	-1.60119	1.78X10-8	DOWN
LRRC8A	-1.60933	1.13X10-8	DOWN
CLDN23	-1.6114	2.31X10-5	DOWN
SYNPO2	-1.61282	7.36X10-4	DOWN
HSPB2	-1.61497	8.93X10-7	DOWN
CAP2	-1.61853	1.13X10-3	DOWN
CHCHD6	-1.62006	1.02X10-5	DOWN
LOC654194	-1.6216	5.92X10-3	DOWN
CKMT2	-1.62294	4.42X10-6	DOWN
WDR55	-1.62374	7.57X10-9	DOWN
MXI1	-1.62455	1.98X10-11	DOWN
SCUBE3	-1.62674	2.28X10-12	DOWN
C12orf31	-1.62802	7.29X10-6	DOWN
ALDH4A1	-1.62898	2.00X10-8	DOWN
SLC47A1	-1.6374	1.53X10-4	DOWN
PACSIN3	-1.63833	8.49X10-7	DOWN
CFDP1	-1.63846	2.03X10-3	DOWN
MAOA	-1.64279	4.21X10-4	DOWN
CSRP2	-1.6447	1.69X10-4	DOWN
SLC1A3	-1.65509	2.89X10-5	DOWN
CBS	-1.65652	1.57X10-6	DOWN
BAMBI	-1.66004	1.87X10-4	DOWN
STK38L	-1.66563	1.55X10-5	DOWN
HES6	-1.6717	2.82X10-9	DOWN
ADH1B	-1.67206	3.78X10-4	DOWN
LDOC1	-1.67574	7.87X10-5	DOWN
H2AFJ	-1.68531	2.14X10-10	DOWN
TMEM47	-1.68917	1.05X10-4	DOWN
FKBP10	-1.69161	6.09X10-9	DOWN
FGF13	-1.69642	6.14X10-6	DOWN
KLK1	-1.7039	1.13X10-8	DOWN
TLE1	-1.70496	1.78X10-7	DOWN
ALOX15B	-1.70911	3.21X10-6	DOWN
TAF5L	-1.70995	3.62X10-14	DOWN
KCNMB1	-1.7106	2.93X10-4	DOWN
RYR2	-1.71352	1.70X10-14	DOWN
MRVI1	-1.71426	1.64X10-7	DOWN
ZNF526	-1.71617	2.58X10-9	DOWN
SERPINA3	-1.71803	1.15X10-6	DOWN
FBXO32	-1.71868	7.09X10-8	DOWN
SOST	-1.71979	2.15X10-5	DOWN
PCDH7	-1.72389	9.43X10-7	DOWN
ASAM	-1.72453	6.63X10-6	DOWN
TMEM120A	-1.73845	5.43X10-6	DOWN
GEFT	-1.74245	4.27X10-12	DOWN
FLJ21986	-1.74623	2.80X10-4	DOWN
PRRX2	-1.74714	2.08X10-11	DOWN
PLD5	-1.74822	1.09X10-6	DOWN
ADAMTS8	-1.75875	2.34X10-5	DOWN
PPAPDC3	-1.77234	3.38X10-10	DOWN
BTC	-1.77243	2.51X10-15	DOWN
SLC24A3	-1.78918	1.84X10-5	DOWN
AKAP1	-1.79171	1.38X10-7	DOWN
SLC25A4	-1.79471	3.21X10-8	DOWN
LOC401093	-1.79668	2.26X10-4	DOWN
LIMCH1	-1.80273	2.09X10-5	DOWN
STAC2	-1.80547	2.47X10-16	DOWN
TGFB1I1	-1.81292	1.52X10-7	DOWN
FAM181B	-1.81854	6.53X10-12	DOWN
LMOD1	-1.81924	1.20X10-3	DOWN
CYP4F11	-1.82129	3.06X10-10	DOWN
RCAN2	-1.82434	1.45X10-4	DOWN
SPR	-1.82448	1.14X10-7	DOWN
PLEKHB2	-1.8263	1.41X10-7	DOWN
ZNF385D	-1.82678	2.61X10-8	DOWN
S1PR3	-1.8287	3.77X10-6	DOWN
TEAD3	-1.82943	6.55X10-7	DOWN
KCNAB1	-1.83029	6.40X10-4	DOWN
PAFAH2	-1.83041	3.09X10-9	DOWN
FABP3	-1.8353	8.07X10-7	DOWN
KLHL30	-1.8409	3.21X10-10	DOWN
ALDH1B1	-1.84292	2.53X10-4	DOWN
EFHD1	-1.84369	1.94X10-5	DOWN
PRUNE2	-1.84709	2.63X10-4	DOWN
PLXNB1	-1.85039	1.46X10-8	DOWN
PDZRN3	-1.8566	1.93X10-6	DOWN
NOV	-1.85705	8.59X10-4	DOWN
RGS5	-1.86051	3.22X10-4	DOWN
GRIA2	-1.87581	2.19X10-6	DOWN
TMOD1	-1.87951	4.06X10-5	DOWN
UQCRH	-1.88413	1.94X10-4	DOWN
RPL24	-1.88523	3.06X10-5	DOWN
TRK1	-1.88762	6.17X10-8	DOWN
RHOBTB3	-1.89348	9.62X10-6	DOWN
SHRM	-1.90226	1.96X10-4	DOWN
AOC3	-1.90729	3.22X10-5	DOWN
NEXN	-1.91431	1.32X10-6	DOWN
FLNC	-1.91769	4.56X10-4	DOWN
CST6	-1.92413	4.95X10-7	DOWN
APEG1	-1.92546	9.58X10-7	DOWN
MTE	-1.93504	4.42X10-9	DOWN
FAT3	-1.93563	7.83X10-8	DOWN
CES1	-1.95655	4.40X10-5	DOWN
COX6B1	-1.97181	4.22X10-4	DOWN
ATOH8	-1.98064	1.44X10-6	DOWN
RPS21	-1.9869	1.10X10-6	DOWN
UQCRB	-1.99738	1.58X10-6	DOWN
RPLP0	-2.00341	1.07X10-2	DOWN
NTN1	-2.0038	1.51X10-6	DOWN
PCDH20	-2.00582	2.98X10-10	DOWN
MFHAS1	-2.01146	1.75X10-8	DOWN
PPP1R14A	-2.01854	7.10X10-7	DOWN
ATP1A2	-2.03619	2.73X10-5	DOWN
LDB3	-2.03985	6.04X10-13	DOWN
LOC441743	-2.04199	4.97X10-12	DOWN
FRZB	-2.04432	3.85X10-6	DOWN
IL17B	-2.04897	3.71X10-10	DOWN
ALDH1L1	-2.05367	2.57X10-11	DOWN
SYNC1	-2.07024	3.18X10-7	DOWN
PCYOX1	-2.07328	1.39X10-10	DOWN
PDGFA	-2.07475	6.31X10-10	DOWN
FIBIN	-2.07577	3.57X10-9	DOWN
WFDC1	-2.10706	1.53X10-5	DOWN
SBSPON	-2.11108	7.05X10-5	DOWN
USF1	-2.1223	2.53X10-5	DOWN
CCDC107	-2.12274	7.35X10-11	DOWN
SGCA	-2.15254	2.27X10-5	DOWN
RPL31	-2.15872	4.69X10-15	DOWN
LOC641849	-2.16325	4.87X10-6	DOWN
FKBP5	-2.17233	1.36X10-13	DOWN
CNN1	-2.18649	6.76X10-4	DOWN
RIMS3	-2.19143	1.15X10-7	DOWN
PPP1R3C	-2.19347	8.40X10-5	DOWN
IL13RA2	-2.20697	2.35X10-7	DOWN
KCNA5	-2.20913	9.37X10-7	DOWN
GPRC5C	-2.21627	4.38X10-10	DOWN
DACT3	-2.22398	1.15X10-6	DOWN
CSDC2	-2.2405	1.24X10-7	DOWN
CSPG4	-2.26472	2.54X10-7	DOWN
PRDM16	-2.26688	3.15X10-8	DOWN
SCRG1	-2.27145	7.89X10-5	DOWN
TBXA2R	-2.27207	7.60X10-15	DOWN
LOC442454	-2.28163	4.63X10-6	DOWN
LOC645968	-2.30703	4.71X10-5	DOWN
ACADL	-2.30796	3.84X10-12	DOWN
RASL12	-2.32386	1.31X10-6	DOWN
ADRA1B	-2.32712	9.95X10-13	DOWN
GNB4	-2.33782	1.48X10-13	DOWN
GLDN	-2.33983	4.92X10-6	DOWN
IGFBP2	-2.3838	5.99X10-7	DOWN
MAP1B	-2.39759	2.18X10-6	DOWN
ANKRD1	-2.41159	1.28X10-10	DOWN
PTPLA	-2.41453	1.60X10-7	DOWN
DUSP26	-2.45571	6.91X10-13	DOWN
RPL21	-2.47658	1.99X10-4	DOWN
ACTA1	-2.48883	2.70X10-9	DOWN
KLF15	-2.49258	1.80X10-15	DOWN
HRCT1	-2.51818	2.55X10-8	DOWN
LOC441763	-2.5824	1.17X10-3	DOWN
NPTX2	-2.58385	2.57X10-9	DOWN
NXPH3	-2.60723	3.11X10-14	DOWN
DKFZp451A211	-2.61566	1.61X10-16	DOWN
LGR6	-2.68712	1.00X10-16	DOWN
FHL5	-2.73257	7.12X10-8	DOWN
CTSZ	-2.77141	2.30X10-7	DOWN
ITGA10	-2.79995	3.22X10-12	DOWN
RAMP1	-2.84231	2.01X10-9	DOWN
CCDC71	-2.84937	6.35X10-21	DOWN
PLN	-2.85931	2.94X10-7	DOWN
GALNTL2	-2.89139	1.85X10-11	DOWN
TCEAL2	-2.92959	5.29X10-8	DOWN
PDE8B	-3.01527	9.84X10-14	DOWN
FAM46B	-3.07635	1.34X10-9	DOWN
TIMP4	-3.1392	1.99X10-9	DOWN
MCAM	-3.15516	2.03X10-11	DOWN
C6orf117	-3.19977	3.28X10-8	DOWN
ZBTB16	-3.25898	3.85X10-11	DOWN
MT1X	-3.26258	7.74X10-9	DOWN
HSPB7	-3.27879	1.53X10-8	DOWN
RPL26	-3.35828	4.82X10-5	DOWN
MT1M	-3.39059	1.04X10-11	DOWN
ACTC1	-3.77489	2.35X10-7	DOWN
ITGA8	-4.40184	2.62X10-10	DOWN
